# Supplementary material
Source: PubMed Central journal article supplement (PMC4215383)
Supplement: Supp_Figure1.pdf [file Supp_Figure1.pdf]

## Supplementary Data

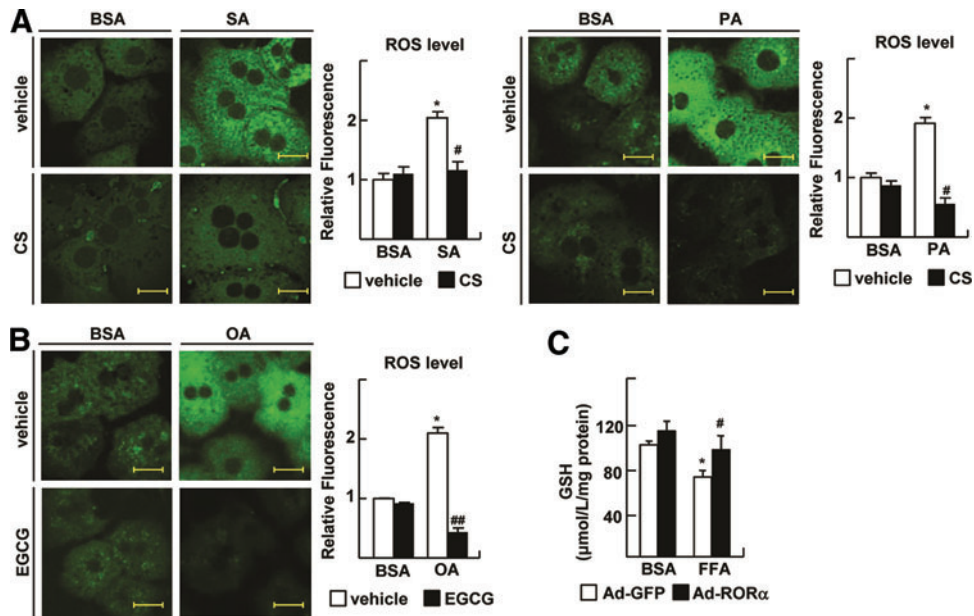

**SUPPLEMENTARY FIG. S1. Primary mouse hepatocytes were obtained from 8- to 9 week-old, male C57BL6/mice by perfusion of liver using collagenase type IV as described in the “Materials and Methods” section. (A) The hepatocytes were treated with 0.2 mM SA or PA with or without 20 μM CS for 24 h as indicated. (B) The hepatocytes were treated with 1.5 mM OA with or without 20 μM EGCG for 24 h as indicated. At the end of the treatment, cells were treated with H<sub>2</sub>DCFDA; fluorescence was examined by fluorescence microscopy (*upper*); and the fluorescence intensity was measured by image J software and normalized by cell number (*lower*). BSA represents 1% BSA supplement alone as control. Yellow bars represent 20 μm. The data represent mean ± standard deviation of three independent experiments. \**p* < 0.05 versus BSA with vehicle; #*p* < 0.05 and ##*p* < 0.01 versus SA, PA, or OA with vehicle. (C) The hepatocytes were infected by Ad-GFP or Ad-RORα. The cells were treated with 0.5 mM FFA mixture for 48 h. At the end of the treatment, the amount of GSH in whole cell lysates was measured as described in the “Materials and Methods” section. \**p* < 0.05 versus BSA with Ad-GFP infection; #*p* < 0.05 versus FFA with Ad-GFP infection (*n* = 3). SA, stearic acid; PA, palmitic acid; OA, oleic acid; EGCG, epigallocatechin gallate; Ad, adenovirus; BSA, bovine serum albumin; CS, cholesterol sulfate; H<sub>2</sub>DCFDA, H<sub>2</sub> 2',7'-dichlorodihydrofluorescein-diacetate; GFP, green fluorescence protein; GSH, glutathione; RORα, retinoic acid-related orphan receptor α.**
