# Supplementary material
Source: PubMed Central journal article supplement (PMC4215383)
Supplement: Supp_Figure2.pdf [file Supp_Figure2.pdf]

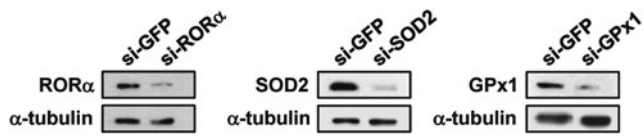

**SUPPLEMENTARY FIG. S2. Effect of si-RNA duplexes on expression of genes.** Primary cultures of rat hepatocytes were transfected with si-ROR $\alpha$ , si-SOD2, or si-GPx1. Protein levels were measured by western blotting. GPx1, glutathione peroxidase 1; si-RNA, small interference RNA; SOD2, superoxide dismutase 2.
