# Supplementary material
Source: PubMed Central journal article supplement (PMC4215383)
Supplement: Supp_Figure3.pdf [file Supp_Figure3.pdf]

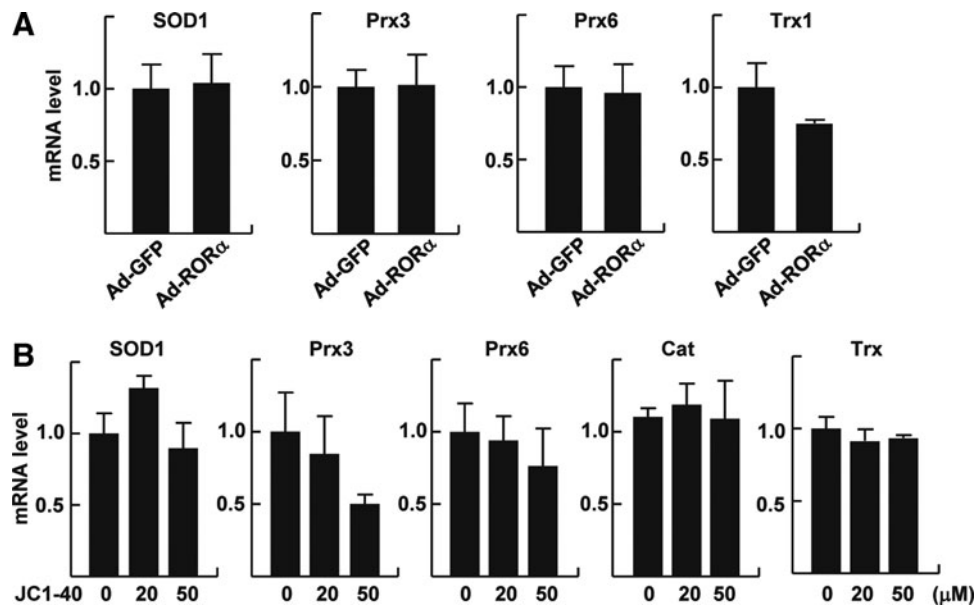

**SUPPLEMENTARY FIG. S3. Effect of ROR $\alpha$  and JC1-40 on the mRNA expression levels of antioxidant enzymes.** (A) The rat hepatocytes were infected by Ad-GFP or Ad-ROR $\alpha$ . (B) HepG2 cells were treated with JC1-40 at the indicated concentration for 24 h. The expression level of mRNA was measured by qRT-PCR ( $n=3$ ). qRT-PCR, quantitative real-time polymerase chain reaction.
