# Supplementary material
Source: PubMed Central journal article supplement (PMC4215383)
Supplement: Supp_Figure4.pdf [file Supp_Figure4.pdf]

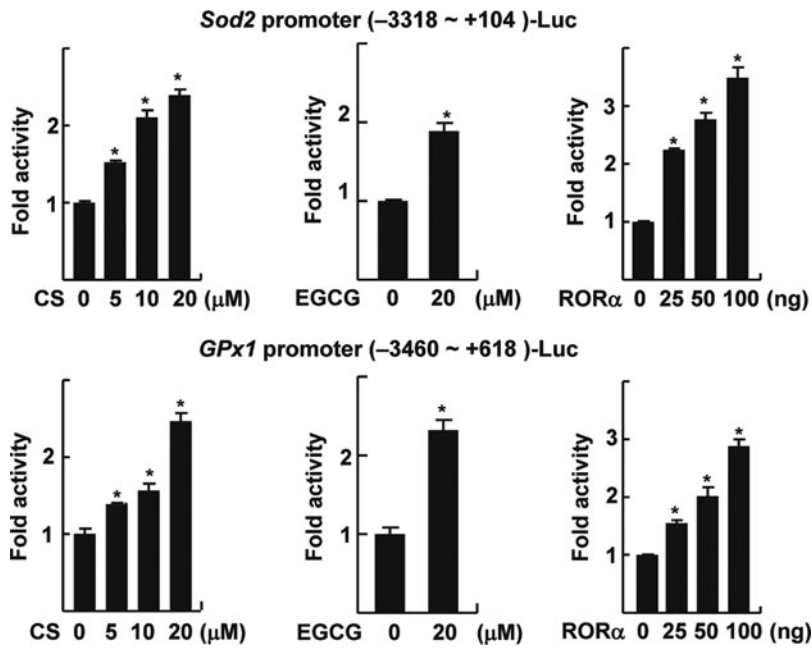

**SUPPLEMENTARY FIG. S4. ROR $\alpha$  increases transcriptional activities of the human Sod2 and the human Gpx1 promoters.** HepG2 cells were transfected with the human Sod2 promoter-Luc or the human Gpx1 promoter-Luc reporter and were treated with the indicated concentrations of CS or EGCG. Otherwise, cells were co-transfected with p3XFLAG7.1-ROR $\alpha$  as indicated. The data represent mean  $\pm$  standard deviation ( $n=3$ ). \* $p<0.05$  versus vehicle or empty vector.
