# Supplementary material
Source: PubMed Central journal article supplement (PMC4215383)
Supplement: Supp_Figure5.pdf [file Supp_Figure5.pdf]

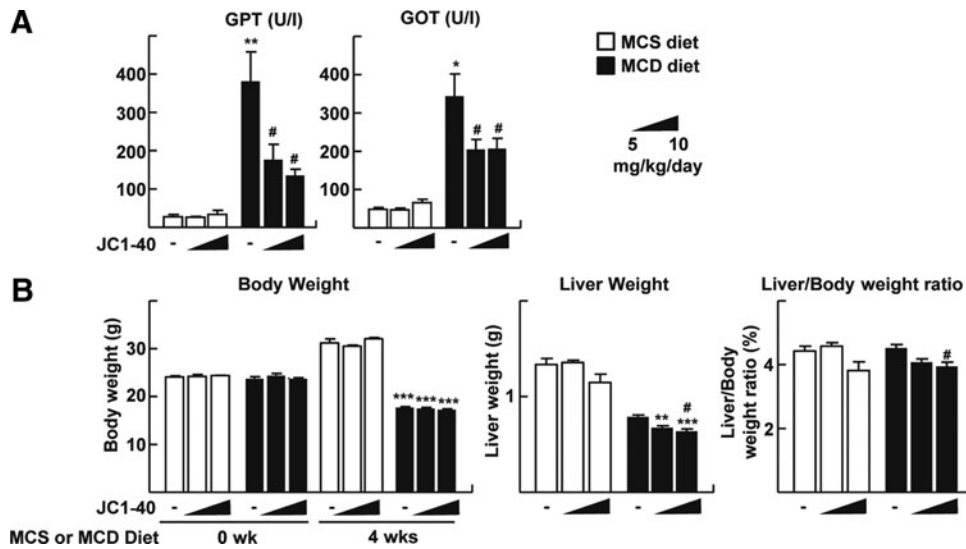

**SUPPLEMENTARY FIG. S5. Eight-week-old C57BL/6N mice were fed with either MCS or MCD diet for 4 weeks.** After 1 week of diet feeding, JC1-40 was administered daily at doses of 5 and 10 mg/kg/day by oral gavage for 3 weeks. **(A)** GPT and GOT enzyme activities in the serum. **(B)** Body weight, liver weight of mice employed in the experiment and their ratios. The data represent mean  $\pm$  standard deviation. \* $p < 0.05$ , \*\* $p < 0.01$ , and \*\*\* $p < 0.001$  versus MCS diet ( $n = 4$ ); # $p < 0.05$  versus MCD diet with vehicle ( $n = 5$ ). GOT, glutamic oxaloacetate transaminase; GPT, glutamic pyruvic transaminase; MCS, methionine-choline sufficient.
