# Supplementary material
Source: PubMed Central journal article supplement (PMC4215383)
Supplement: Supp_Figure6.pdf [file Supp_Figure6.pdf]

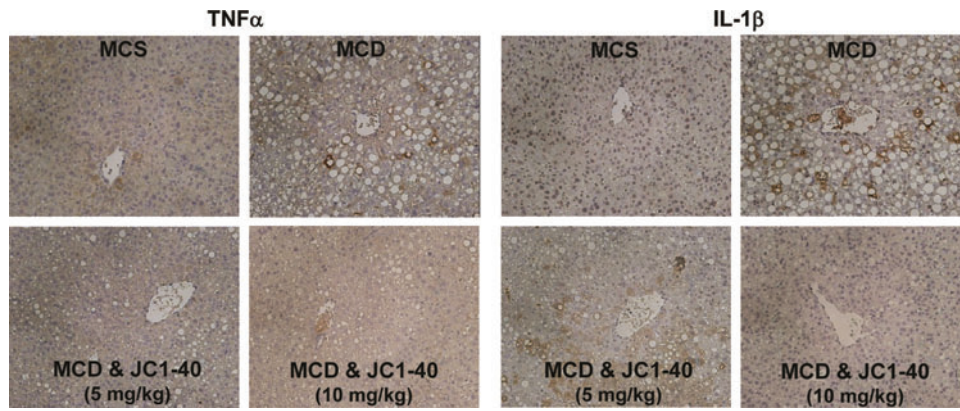

**SUPPLEMENTARY FIG. S6. Administration of JC1-40 attenuates inflammatory responses in the MCD diet-induced NASH.** Eight-week-old C57BL/6N mice were fed with either MCS or MCD diet for 4 weeks. After 1 week of diet feeding, JC1-40 was administered daily at doses of 5 and 10 mg/kg/day by oral gavage for 3 weeks. Liver sections were stained with anti-TNF $\alpha$  or anti-IL-1 $\beta$  antibodies. Magnification of  $\times 200$ . IL, interleukin; NASH, nonalcoholic steatohepatitis; TNF $\alpha$ , tumor necrosis factor  $\alpha$ .
