# Supplementary material
Source: PubMed Central journal article supplement (PMC4215383)
Supplement: Supp_Figure7.pdf [file Supp_Figure7.pdf]

GEO accession: GSE17470

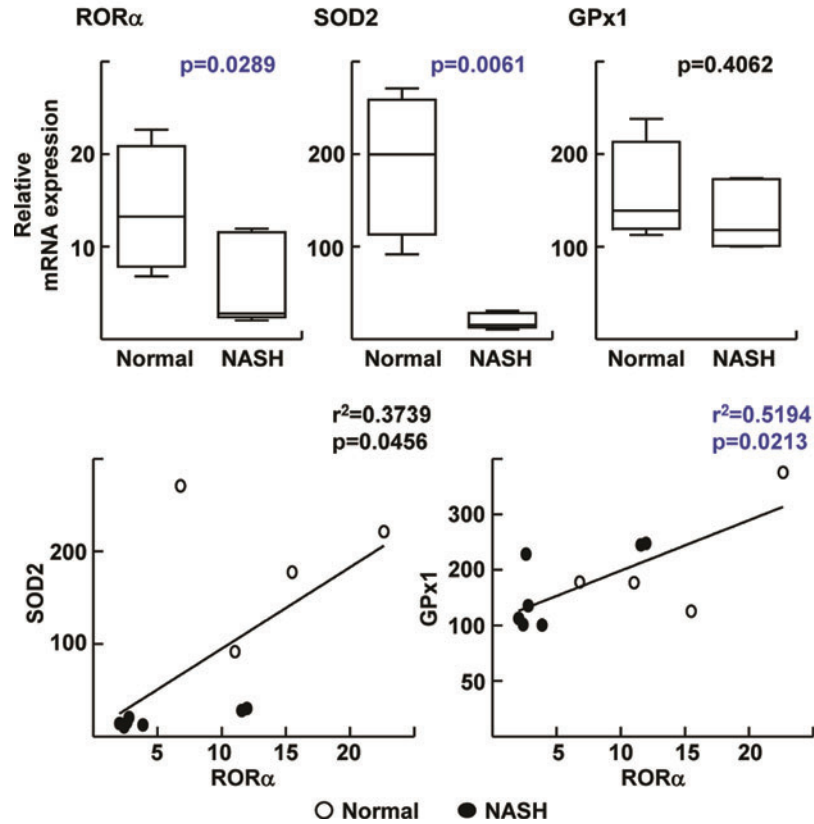

**SUPPLEMENTARY FIG. S7. Expression levels of ROR $\alpha$ , SOD2, and GPx1 in human NASH patients: Database-based gene expression analysis.** The public datasets were obtained from GEO site at the NCBI gene expression ([www.ncbi.nlm.nih.gov/geo](http://www.ncbi.nlm.nih.gov/geo)). The data processed as median-normalized signal intensity value. Significances were analyzed by Mann–Whitney  $U$  test, and the positive correlation coefficients ( $r$ ) were calculated by Pearson correlation test.
