# Supplementary material
Source: PubMed Central journal article supplement (PMC4215383)
Supplement: Supp_Figure8.pdf [file Supp_Figure8.pdf]

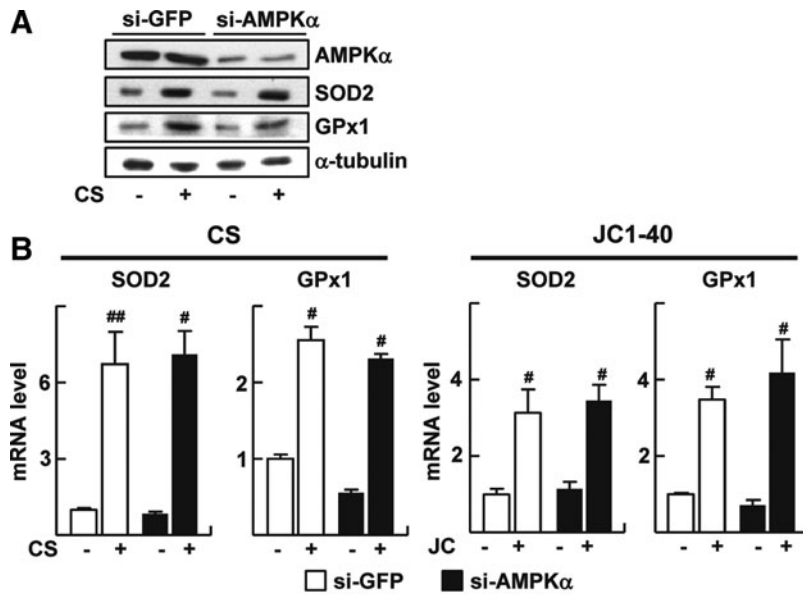

**SUPPLEMENTARY FIG. S8. The CS-induced expression of SOD2 and GPx1 is not AMPK $\alpha$  dependent.** Primary rat hepatocytes were transfected with si-AMPK $\alpha$  and then treated with 20  $\mu$ M CS (A) or 50  $\mu$ M JC1-40 (B) for 24 h. The protein- and mRNA-level were measured by western blotting and qRT-PCR, respectively. <sup>#</sup> $p$ <0.05 and <sup>##</sup> $p$ <0.01 versus vehicle with si-GFP or si-AMPK $\alpha$ . AMPK, AMP-activated protein kinase
