# Supplementary material
Source: PubMed Central journal article supplement (PMC4215383)
Supplement: Supp_Figure9.pdf [file Supp_Figure9.pdf]

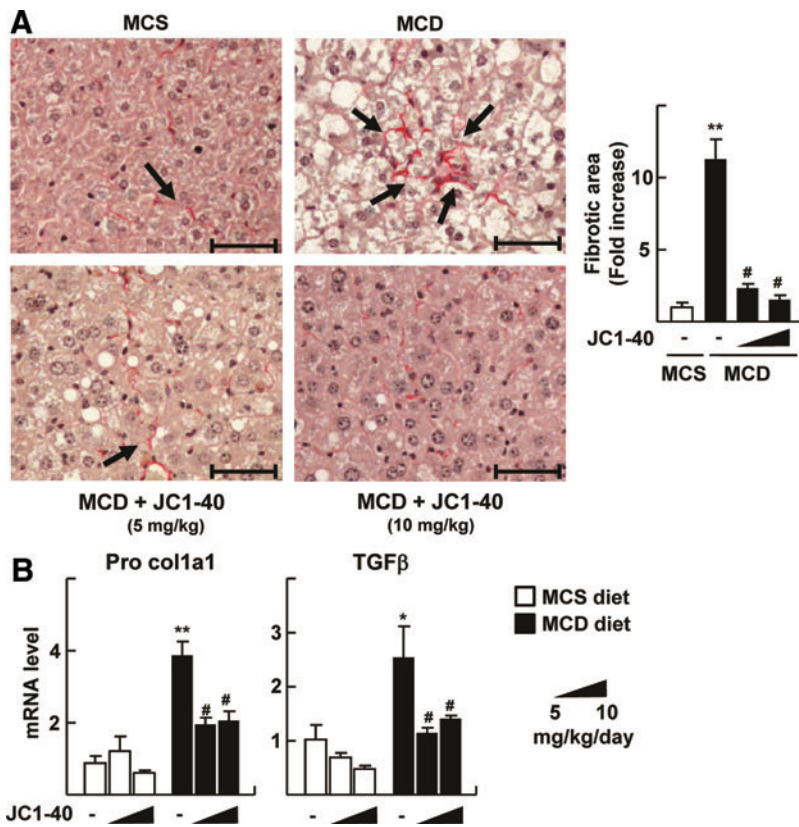

**SUPPLEMENTARY FIG. S9. ROR $\alpha$  reduces signs of hepatic collagen fibrosis.** (A) Eight-week-old C57BL/6N mice were fed with either MCS or MCD diet for 4 weeks. After 1 week of diet feeding, JC1-40 was administered daily at doses of 5 and 10 mg/kg/day by oral gavage for 3 weeks. Liver sections were stained with Sirius-red, and the *arrows* indicated collagen deposition. Fibrotic area in the liver sections was analyzed using ImageJ software. Black bars represent 50  $\mu$ m. \*\* $p$  < 0.01 versus MCS diet ( $n$  = 4); # $p$  < 0.05 versus MCD diet with vehicle ( $n$  = 5). (B) mRNA expression of pro col1a1 and TGF $\beta$  in the livers of MCD diet fed in (A) was analyzed by qRT-PCR. \* $p$  < 0.05 and \*\* $p$  < 0.01 versus MCS diet with vehicle ( $n$  = 4); # $p$  < 0.05 versus MCD diet with vehicle ( $n$  = 5). TGF $\beta$ , transforming growth factor  $\beta$ .
