# Supplementary material
Source: PubMed Central journal article supplement (PMC4215383)
Supplement: Supp_Table1.pdf [file Supp_Table1.pdf]

SUPPLEMENTARY TABLE S1. PRIMER SEQUENCES USED FOR CHIP ASSAY

| <i>Promoter</i> | <i>Target elements</i> | <i>Nucleotide sequence</i>                                                               |
|-----------------|------------------------|------------------------------------------------------------------------------------------|
| SOD2            | RORE1                  | Sense: 5'-TGGACCATGAGGCAGCTTTGAAGACA-3'<br>Antisense: 5'-TTTAGGTGGCCACTGTAGAGGGTACTGA-3' |
|                 | RORE2                  | Sense: 5'-GCCTGAGCTCAGCCTCCCAATAGGA-3'<br>Antisense: 5'-GCAGACAAGAGCAGGGGTTTGATGTGA-3'   |
| GPx1            | RORE1                  | Sense: 5'-TGATGCTATCTCGGCTGCAA-3'<br>Antisense: 5'-TCTTTGGCCTCACATGTACCA-3'              |
|                 | RORE2                  | Sense: 5'-ATCTTGGCCTCTCAGAAACCA-3'<br>Antisense: 5'-CATATGGTAACTACCCCTACCA-3'            |

ChIP, chromatin immunoprecipitation; GPx1, glutathione peroxidase 1; RORE, ROR response element.
