# Supplementary material
Source: PubMed Central journal article supplement (PMC4215383)
Supplement: Supp_Table2.pdf [file Supp_Table2.pdf]

SUPPLEMENTARY TABLE S2. PRIMER SEQUENCES USED FOR QUANTITATIVE REAL-TIME POLYMERASE CHAIN REACTION

| <i>Gene</i>    | <i>Accession number</i>             | <i>Nucleotide sequence</i>                                                                                                                                   | <i>Species</i>    |
|----------------|-------------------------------------|--------------------------------------------------------------------------------------------------------------------------------------------------------------|-------------------|
| SOD2           | NM_017051<br>NM_013671<br>NM_000636 | Sense: 5'-CACCGAGGAGAAGTACCA-3'<br>Antisense: 5'-ACACATCAATCCCCAGCA-3'                                                                                       | Rat, mouse, human |
| GPx1           | NM_030826<br>NM_008160<br>NM_000581 | Sense: 5'-TTCCCGTGCAACCAGTTTG-3'<br>Antisense: 5'-TTCACCTCGCACTTCTCGAA-3'                                                                                    | Rat, mouse, human |
| ROR $\alpha$   | NM_001106834<br>NM_013646           | Sense: 5'-GATCGCTCGTGGCTTCAGGAA-3'<br>Antisense: 5'-TGGAGGAAAATGGAGTCGCACA-3'                                                                                | Rat, mouse        |
| TNF $\alpha$   | NM_012675<br>NM_013693              | Sense: 5'-GGGTGATCGGTCCCAA-3'<br>Antisense: 5'-CTGACGGTGTGGGTGA-3'                                                                                           | Rat, Mouse        |
| IL-1 $\beta$   | NM_031512<br>NM_008361              | Sense: 5'-AGAGCCCATCCTCTGTGACTCA-3'<br>Antisense: 5'-TGCTTGGGATCCACACTCTCCA-3'                                                                               | Rat, mouse        |
| F4/80          | NM_010130                           | Sense: 5'-CTTTGGCTATGGGCTTCCAGTC-3'<br>Antisense: 5'-GCAAGGAGGACAGAGTTTATCGTG-3'                                                                             | Mouse             |
| SOD1           | NM_000454<br>NM_017050              | Sense: 5'-TGGAGACTTGGGCAATGTGA-3'<br>Antisense: 5'-CACAAGCCAAACGACTTCCA-3'<br>Sense: 5'-TCACTTCGAGCAGAAGGCAA-3'<br>Antisense: 5'-TTGTTTCTCGTGGACCACCA-3'     | Human<br>Rat      |
| Prx3           | NM_006793<br>NM_022540              | Sense: 5'-GTCGGTTGCCCGACATGTGA-3'<br>Antisense: 5'-GCAGGTGCATGGCATGAGGA-3'<br>Sense: 5'-GCACCAGTTCTTCATTCCACA-3'<br>Antisense: 5'-TGATCCAGGCAAGATGACTGA-3'   | Human<br>Rat      |
| Prx6           | NM_004905<br>NM_053576              | Sense: 5'-AGCTCGTGTGGTGTGTTGT-3'<br>Antisense: 5'-TCTTCAGGGATGGTTGGA-3'<br>Sense: 5'-CACATCCGCTTCCACGATTCCTA-3'<br>Antisense: 5'-CCAGGCAAAATGGTCCTCAACAGA-3' | Human<br>Rat      |
| Cat            | NM_001752                           | Sense: 5'-CATCGCCACATGAATGGATA-3'<br>Antisense: 5'-CCAAGTGGGATGAGAGGGTA-3'                                                                                   | Human             |
| Trx            | NM_003329<br>NM_053800              | Sense: 5'-AGCAGATCGAGAGCAAGACT-3'<br>Antisense: 5'-CACTCTGAAGCAACATCCTG-3'<br>Sense: 5'-TCCAATGTGGTGTTCCTTGA-3'<br>Antisense: 5'-ACCAGAGAACTCCCCAACCT-3'     | Human<br>Rat      |
| TGF $\beta$    | NM_011577                           | Sense: 5'-CGACATGGAGCTGGTGA-3'<br>Antisense: 5'-TCCCGAATGTCTGACGTA-3'                                                                                        | Mouse             |
| Pro-Coll1a1    | NM_007742                           | Sense: 5'-GACATCCCTGAAGTCAGCTGC-3'<br>Antisense: 5'-TCCCTTGGGTCCCTCGAC-3'                                                                                    | Mouse             |
| $\beta$ -Actin | NM_001101<br>NM_031144<br>NM_007393 | Sense: 5'-CGTGGGCCGCCCTAGGCACCA-3'<br>Antisense: 5'-TTGGCTTAGGGTTCAGGGGGG-3'                                                                                 | Human, rat, mouse |
