# Supplementary material
Source: PubMed Central journal article supplement (PMC4215383)
Supplement: Supp_Table3.pdf [file Supp_Table3.pdf]

SUPPLEMENTARY TABLE S3. COMPOSITION  
OF MCD AND MCS DIET<sup>a</sup>

| <i>Nutrients (g/kg diet)</i> | <i>MCD</i> | <i>MCS</i> |
|------------------------------|------------|------------|
| L-Amino acids                | 142.0      | 142.0      |
| L-Methionine                 | 0.0        | 1.7        |
| Choline chloride             | 0.0        | 8.0        |
| Cornstarch                   | 100.0      | 100.0      |
| Dextrin                      | 100.0      | 100.0      |
| Sucrose                      | 408.6      | 398.7      |
| Cellulose                    | 50.0       | 50.0       |
| Corn oil                     | 50.0       | 50.0       |
| Sodium bicarbonate           | 4.3        | 4.3        |
| Primex                       | 100.0      | 100.0      |
| Salt mix                     | 35.0       | 35.0       |
| Vitamin mix                  | 10.0       | 10.0       |
| Ferric citrate               | 0.1        | 0.3        |

<sup>a</sup>From the web site [www.dyets.com](http://www.dyets.com)  
MCS, methionine-choline sufficient.
